# Supplementary material
Source: ML conference proceedings conference paper supplement (https://openaccess.thecvf.com/content/ICCV2023/html/Yu_Bidirectionally_Deformable_Motion_ICCV_2023_paper.html)
Supplement: Supplementary file 3 [file Yu_Bidirectionally_Deformable_Motion_ICCV_2023_supplemental.zip]

Archive with 4 entries (4 files):
- 06093-supp.pdf
- __MACOSX/._06093-supp.pdf
- video_supplementary_iccv.zip
- __MACOSX/._video_supplementary_iccv.zip
